# Supplementary material for: Traffic pollution and the incidence of cardiorespiratory outcomes in an adult cohort in London
Source: PubMed Central journal article supplement (PMC5241502; doi:10.1136/oemed-2015-103531), 2016-06-24
Supplement: oemed-2015-103531supp.pdf [file oemed-2015-103531supp.pdf]

## Supplemental Material

**Title:** Traffic pollution and the incidence of cardio-respiratory outcomes in an adult cohort in London

**Authors:** IM Carey, HR Anderson, RW Atkinson, S Beevers, DG Cook, D Dajnak, J Gulliver, FJ Kelly.

### Contents

- **Figure S1** – Practice means, and 10th and 90th percentiles for NO<sub>x</sub> and L<sub>night</sub>
- **Table S1** – Mean and correlation summary for traffic air pollutants and night noise
- **Table S2** – Hazard ratios for incident CHD, heart failure, hypertension during 2005-11 by NO<sub>x</sub>, PM<sub>2.5</sub> (traffic sources only) and L<sub>night</sub> restricted to patients based on registration length or aircraft/rail noise profiles
- **Table S3** - Hazard ratios for all outcomes during 2005-2011 for NO<sub>x</sub>, PM<sub>2.5</sub> (traffic sources only) and L<sub>night</sub> stratified by age
- **Table S4** - Hazard ratios for all outcomes during 2005-2011 for NO<sub>x</sub>, PM<sub>2.5</sub> (traffic sources only) and L<sub>night</sub> stratified by smoking
- **Table S5** – Hazard ratios for all outcomes during 2005-2011 for pollutants not in main paper - NO<sub>2</sub>, PM<sub>2.5</sub> (exhaust) and PM<sub>2.5</sub> (traffic non-exhaust)
- **Table S6** – Hazard ratios for between and within practice effects for all outcomes during 2005-2011 by NO<sub>x</sub>, PM<sub>2.5</sub> (traffic sources only) and L<sub>night</sub>

Figure S1 – Practice means, and 10<sup>th</sup> and 90<sup>th</sup> percentiles for NO<sub>x</sub> and L<sub>night</sub>

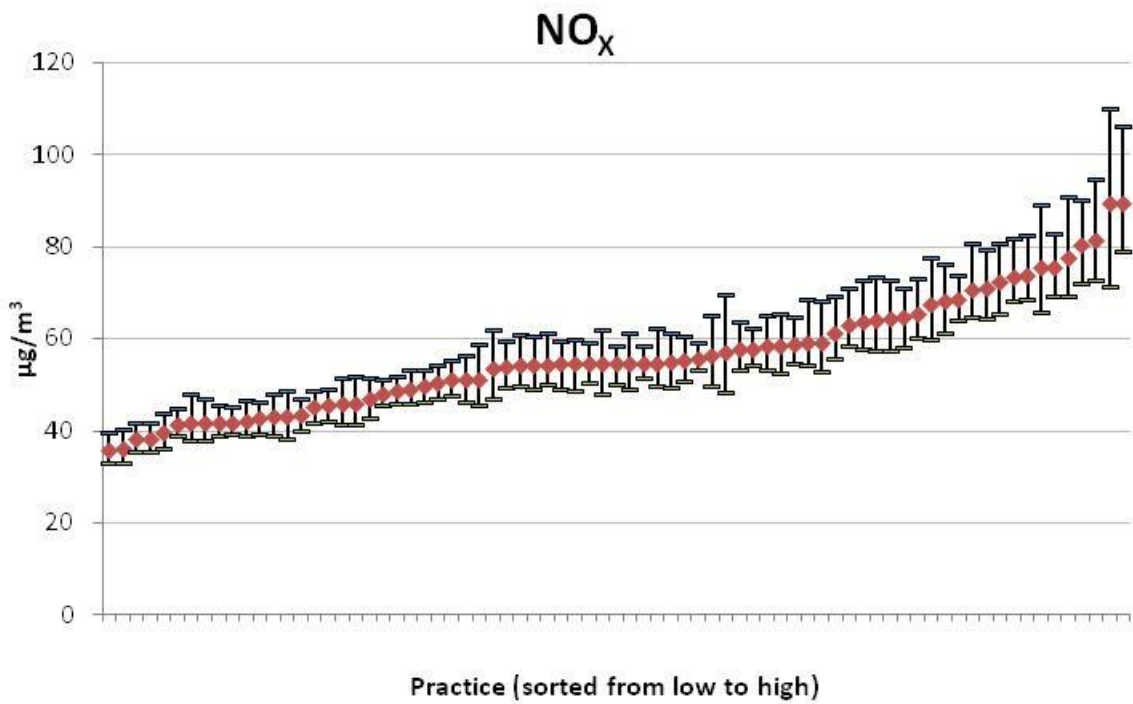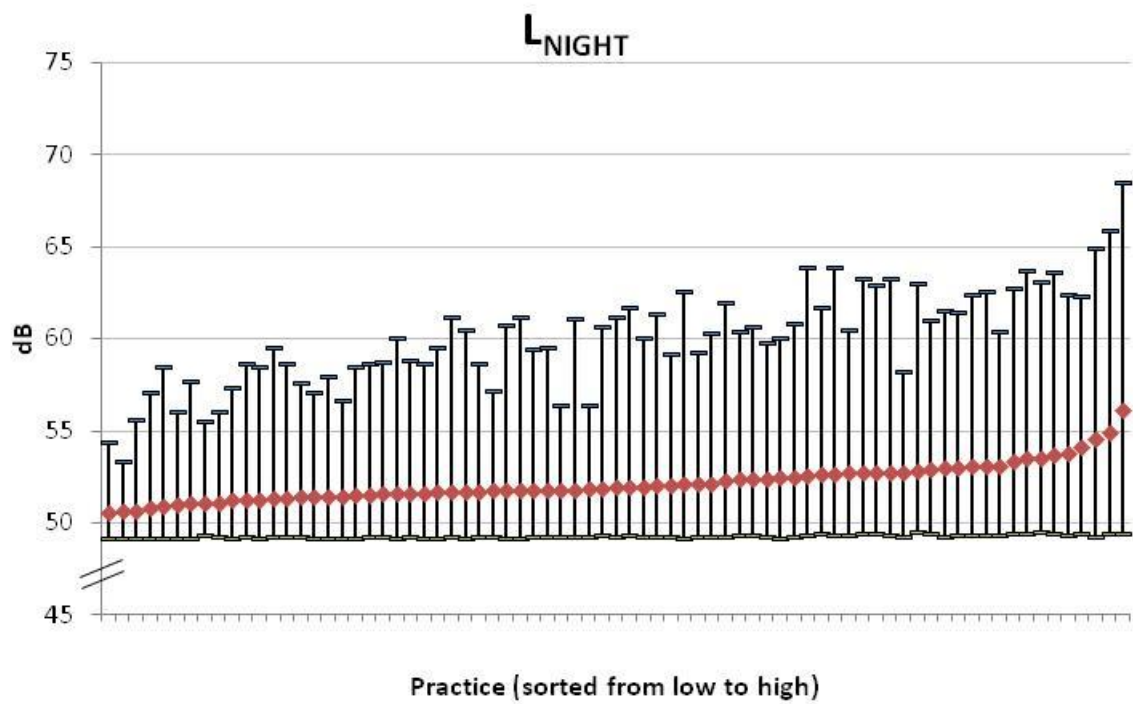

**Table S1 – Mean and correlation summary for traffic air pollutants and night noise**

| Traffic Exposure                                | Mean | Std Dev | Inter<br>Quartile<br>Range | ICC† | Correlations between pollutants |                 |                              |                                      |                                         |                    |
|-------------------------------------------------|------|---------|----------------------------|------|---------------------------------|-----------------|------------------------------|--------------------------------------|-----------------------------------------|--------------------|
|                                                 |      |         |                            |      | NO <sub>2</sub>                 | NO <sub>x</sub> | PM <sub>2.5</sub><br>exhaust | PM <sub>2.5</sub><br>non-<br>exhaust | PM <sub>2.5</sub><br>traffic<br>sources | L <sub>night</sub> |
| NO <sub>2</sub>                                 | 37.4 | 5.8     | 7.6                        | 0.86 | –                               | 0.99            | 0.93                         | 0.92                                 | 0.94                                    | 0.35               |
| NO <sub>x</sub>                                 | 63.0 | 15.1    | 18.6                       | 0.80 |                                 | –               | 0.95                         | 0.94                                 | 0.96                                    | 0.40               |
| PM <sub>2.5</sub> exhaust                       | 0.80 | 0.30    | 0.31                       | 0.70 |                                 |                 | –                            | 0.95                                 | 0.99                                    | 0.49               |
| PM <sub>2.5</sub> non-exhaust                   | 0.65 | 0.23    | 0.28                       | 0.61 |                                 |                 |                              | –                                    | 0.99                                    | 0.56               |
| Combined PM <sub>2.5</sub> from traffic sources | 1.45 | 0.52    | 0.60                       | 0.67 |                                 |                 |                              |                                      | –                                       | 0.52               |
| Night Road Traffic Noise (L <sub>night</sub> )  | 52.1 | 4.6     | 2.6                        | 0.05 |                                 |                 |                              |                                      |                                         | –                  |

**Table S2 – Hazard ratios for incident CHD, heart failure, hypertension during 2005-11 by NO<sub>x</sub>, PM<sub>2.5</sub> (traffic sources only) and L<sub>night</sub> restricted to patients based on registration length or aircraft/rail noise profiles**

| Traffic Exposure                                                              | Unit/category              | CHD         |           |             |           | Heart failure |           |             |           | Hypertension |           |             |           |
|-------------------------------------------------------------------------------|----------------------------|-------------|-----------|-------------|-----------|---------------|-----------|-------------|-----------|--------------|-----------|-------------|-----------|
|                                                                               |                            | Base model  |           | Base + IMD  |           | Base model    |           | Base + IMD  |           | Base model   |           | Base + IMD  |           |
|                                                                               |                            | HR          | 95% CI    | HR          | 95% CI    | HR            | 95% CI    | HR          | 95% CI    | HR           | 95% CI    | HR          | 95% CI    |
| Patients registered in same practice for 10+ yrs (n=131,219)                  |                            |             |           |             |           |               |           |             |           |              |           |             |           |
| <b>NO<sub>x</sub></b>                                                         | 20µg/m <sup>3</sup> change | <b>0.99</b> | 0.93-1.04 | <b>0.96</b> | 0.91-1.01 | <b>1.18</b>   | 1.07-1.30 | <b>1.11</b> | 1.01-1.23 | <b>1.08</b>  | 1.00-1.17 | <b>1.04</b> | 0.96-1.13 |
| <b>PM<sub>2.5</sub> Traffic</b>                                               | 1µg/m <sup>3</sup> change  | <b>0.98</b> | 0.91-1.05 | <b>0.94</b> | 0.87-1.02 | <b>1.25</b>   | 1.10-1.42 | <b>1.16</b> | 1.02-1.32 | <b>1.08</b>  | 0.96-1.21 | <b>1.02</b> | 0.90-1.14 |
| <b>L<sub>night</sub></b>                                                      | 60-dB vs. <55dB            | <b>0.98</b> | 0.87-1.10 | <b>0.97</b> | 0.87-1.09 | <b>1.02</b>   | 0.84-1.24 | <b>1.00</b> | 0.82-1.22 | <b>0.99</b>  | 0.92-1.06 | <b>0.97</b> | 0.91-1.04 |
| Patients resident in area of non Aircraft or Rail noise pollution (n=155,670) |                            |             |           |             |           |               |           |             |           |              |           |             |           |
| <b>NO<sub>x</sub></b>                                                         | 20µg/m <sup>3</sup> change | <b>1.00</b> | 0.96-1.04 | <b>0.97</b> | 0.93-1.02 | <b>1.22</b>   | 1.11-1.33 | <b>1.15</b> | 1.03-1.28 | <b>1.11</b>  | 1.01-1.23 | <b>1.06</b> | 0.97-1.16 |
| <b>PM<sub>2.5</sub> Traffic</b>                                               | 1µg/m <sup>3</sup> change  | <b>1.00</b> | 0.94-1.06 | <b>0.97</b> | 0.91-1.03 | <b>1.30</b>   | 1.15-1.46 | <b>1.21</b> | 1.05-1.38 | <b>1.13</b>  | 0.98-1.29 | <b>1.05</b> | 0.92-1.20 |
| <b>L<sub>night</sub></b>                                                      | 60-dB vs. <55dB            | <b>0.99</b> | 0.90-1.09 | <b>0.99</b> | 0.90-1.08 | <b>1.12</b>   | 0.95-1.32 | <b>1.10</b> | 0.93-1.29 | <b>1.01</b>  | 0.95-1.08 | <b>1.00</b> | 0.94-1.06 |

Base model: Age, gender, smoking & BMI.

**Table S3 – Hazard ratios for all outcomes during 2005-2011 for NO<sub>x</sub>, PM<sub>2.5</sub> (traffic sources only) and L<sub>night</sub> stratified by age**

| Exposure                        | Age (yrs) | Unit                       | CHD          |           | MI                  |           | Stroke      |           | Heart failure |           |
|---------------------------------|-----------|----------------------------|--------------|-----------|---------------------|-----------|-------------|-----------|---------------|-----------|
|                                 |           |                            | HR           | 95% CI    | HR                  | 95% CI    | HR          | 95% CI    | HR            | 95% CI    |
| <b>NO<sub>x</sub></b>           | Age <65y  | 20µg/m <sup>3</sup> change | <b>0.95</b>  | 0.90-1.01 | <b>0.87</b>         | 0.78-0.96 | <b>0.86</b> | 0.79-0.92 | <b>1.04</b>   | 0.89-1.23 |
|                                 | Age ≥65y  | 20µg/m <sup>3</sup> change | <b>1.00</b>  | 0.93-1.06 | <b>0.94</b>         | 0.86-1.04 | <b>0.94</b> | 0.86-1.02 | <b>1.13</b>   | 1.03-1.24 |
| <b>PM<sub>2.5</sub> Traffic</b> | Age <65y  | 1µg/m <sup>3</sup> change  | <b>0.95</b>  | 0.88-1.03 | <b>0.86</b>         | 0.75-0.98 | <b>0.82</b> | 0.73-0.92 | <b>1.06</b>   | 0.84-1.33 |
|                                 | Age ≥65y  | 1µg/m <sup>3</sup> change  | <b>0.97</b>  | 0.88-1.07 | <b>0.90</b>         | 0.78-1.04 | <b>0.94</b> | 0.83-1.06 | <b>1.20</b>   | 1.07-1.34 |
| <b>L<sub>night</sub></b>        | Age <65y  | 60-dB vs. <55dB            | <b>1.01</b>  | 0.90-1.13 | <b>1.03</b>         | 0.86-1.24 | <b>0.88</b> | 0.78-1.17 | <b>0.99</b>   | 0.75-1.32 |
|                                 | Age ≥65y  | 60-dB vs. <55dB            | <b>1.00</b>  | 0.88-1.13 | <b>0.95</b>         | 0.78-1.16 | <b>0.95</b> | 0.82-1.10 | <b>1.12</b>   | 0.96-1.31 |
|                                 |           |                            | Hypertension |           | Atrial fibrillation |           | COPD        |           | Pneumonia     |           |
| <b>NO<sub>x</sub></b>           | Age <65y  | 20µg/m <sup>3</sup> change | <b>1.03</b>  | 0.95-1.13 | <b>0.94</b>         | 0.87-1.01 | <b>1.00</b> | 0.85-1.17 | <b>1.03</b>   | 0.94-1.13 |
|                                 | Age ≥65y  | 20µg/m <sup>3</sup> change | <b>1.10</b>  | 1.01-1.19 | <b>1.01</b>         | 0.95-1.07 | <b>0.98</b> | 0.86-1.11 | <b>1.08</b>   | 1.00-1.17 |
| <b>PM<sub>2.5</sub> Traffic</b> | Age <65y  | 1µg/m <sup>3</sup> change  | <b>1.01</b>  | 0.89-1.14 | <b>0.93</b>         | 0.83-1.04 | <b>1.01</b> | 0.82-1.25 | <b>1.01</b>   | 0.89-1.15 |
|                                 | Age ≥65y  | 1µg/m <sup>3</sup> change  | <b>1.10</b>  | 0.98-1.24 | <b>1.02</b>         | 0.93-1.11 | <b>0.95</b> | 0.80-1.13 | <b>1.08</b>   | 0.98-1.20 |
| <b>L<sub>night</sub></b>        | Age <65y  | 60-dB vs. <55dB            | <b>0.95</b>  | 0.89-1.01 | <b>0.92</b>         | 0.78-1.09 | <b>1.03</b> | 0.89-1.19 | <b>0.97</b>   | 0.81-1.15 |
|                                 | Age ≥65y  | 60-dB vs. <55dB            | <b>1.09</b>  | 1.01-1.19 | <b>0.97</b>         | 0.88-1.07 | <b>0.93</b> | 0.81-1.07 | <b>0.96</b>   | 0.84-1.11 |

All Hazard Ratios adjusted for Age, gender, smoking, BMI & IMD.

**Table S4 – Hazard ratios for all outcomes during 2005-2011 for NO<sub>x</sub>, PM<sub>2.5</sub> (traffic sources only) and L<sub>night</sub> stratified by smoking**

| Exposure                  | Smoking | Unit                       | CHD          |           | MI                  |           | Stroke      |           | Heart failure |           |
|---------------------------|---------|----------------------------|--------------|-----------|---------------------|-----------|-------------|-----------|---------------|-----------|
|                           |         |                            | HR           | 95% CI    | HR                  | 95% CI    | HR          | 95% CI    | HR            | 95% CI    |
| NO <sub>x</sub>           | Never   | 20µg/m <sup>3</sup> change | <b>1.02</b>  | 0.95-1.09 | <b>0.92</b>         | 0.82-1.03 | <b>0.87</b> | 0.80-0.94 | <b>1.11</b>   | 0.99-1.25 |
|                           | Current | 20µg/m <sup>3</sup> change | <b>0.94</b>  | 0.88-0.99 | <b>0.89</b>         | 0.81-0.97 | <b>0.90</b> | 0.80-1.01 | <b>1.17</b>   | 1.03-1.34 |
| PM <sub>2.5</sub> Traffic | Never   | 1µg/m <sup>3</sup> change  | <b>1.03</b>  | 0.93-1.14 | <b>0.90</b>         | 0.77-1.06 | <b>0.84</b> | 0.74-0.96 | <b>1.14</b>   | 0.98-1.32 |
|                           | Current | 1µg/m <sup>3</sup> change  | <b>0.90</b>  | 0.83-0.98 | <b>0.85</b>         | 0.74-0.97 | <b>0.87</b> | 0.73-1.04 | <b>1.25</b>   | 1.03-1.50 |
| L <sub>night</sub>        | Never   | 60-dB vs. <55dB            | <b>1.16</b>  | 1.03-1.32 | <b>1.06</b>         | 0.84-1.33 | <b>0.83</b> | 0.69-1.01 | <b>1.14</b>   | 0.92-1.41 |
|                           | Current | 60-dB vs. <55dB            | <b>0.84</b>  | 0.72-1.00 | <b>0.87</b>         | 0.70-1.07 | <b>0.99</b> | 0.81-1.22 | <b>0.98</b>   | 0.69-1.41 |
|                           |         |                            | Hypertension |           | Atrial fibrillation |           | COPD        |           | Pneumonia     |           |
| NO <sub>x</sub>           | Never   | 20µg/m <sup>3</sup> change | <b>1.05</b>  | 0.97-1.13 | <b>0.97</b>         | 0.91-1.03 | <b>0.98</b> | 0.79-1.21 | <b>1.09</b>   | 0.99-1.20 |
|                           | Current | 20µg/m <sup>3</sup> change | <b>1.07</b>  | 0.97-1.18 | <b>0.96</b>         | 0.86-1.07 | <b>1.01</b> | 0.87-1.16 | <b>1.07</b>   | 0.97-1.18 |
| PM <sub>2.5</sub> Traffic | Never   | 1µg/m <sup>3</sup> change  | <b>1.03</b>  | 0.92-1.16 | <b>0.95</b>         | 0.86-1.05 | <b>0.98</b> | 0.74-1.32 | <b>1.08</b>   | 0.95-1.24 |
|                           | Current | 1µg/m <sup>3</sup> change  | <b>1.05</b>  | 0.91-1.21 | <b>0.97</b>         | 0.83-1.14 | <b>1.01</b> | 0.84-1.22 | <b>1.03</b>   | 0.91-1.17 |
| L <sub>night</sub>        | Never   | 60-dB vs. <55dB            | <b>0.99</b>  | 0.92-1.06 | <b>0.94</b>         | 0.82-1.08 | <b>0.94</b> | 0.72-1.22 | <b>1.09</b>   | 0.91-1.31 |
|                           | Current | 60-dB vs. <55dB            | <b>0.98</b>  | 0.90-1.08 | <b>0.92</b>         | 0.74-1.14 | <b>1.04</b> | 0.91-1.17 | <b>0.90</b>   | 0.73-1.11 |

All Hazard Ratios adjusted for Age, gender, smoking, BMI & IMD.

**Table S5 – Hazard ratios for all outcomes during 2005-2011 for pollutants not in main paper - NO<sub>2</sub>, PM<sub>2.5</sub> (exhaust) and PM<sub>2.5</sub> (traffic non-exhaust)**

| Exposure                                    | Unit                        | CHD          |           | MI                  |           | Stroke      |           | Heart failure |           |
|---------------------------------------------|-----------------------------|--------------|-----------|---------------------|-----------|-------------|-----------|---------------|-----------|
|                                             |                             | HR           | 95% CI    | HR                  | 95% CI    | HR          | 95% CI    | HR            | 95% CI    |
| <b>NO<sub>2</sub></b>                       | 10µg/m <sup>3</sup> change  | <b>0.97</b>  | 0.91-1.02 | <b>0.88</b>         | 0.79-0.97 | <b>0.88</b> | 0.82-0.95 | <b>1.15</b>   | 1.02-1.30 |
| <b>PM<sub>2.5</sub> Traffic Exhaust</b>     | 0.5µg/m <sup>3</sup> change | <b>0.96</b>  | 0.91-1.01 | <b>0.89</b>         | 0.82-0.98 | <b>0.90</b> | 0.83-0.97 | <b>1.14</b>   | 1.02-1.27 |
| <b>PM<sub>2.5</sub> Traffic Non-Exhaust</b> | 0.5µg/m <sup>3</sup> change | <b>0.97</b>  | 0.91-1.04 | <b>0.87</b>         | 0.77-0.98 | <b>0.87</b> | 0.79-0.97 | <b>1.16</b>   | 1.02-1.31 |
|                                             |                             | Hypertension |           | Atrial fibrillation |           | COPD        |           | Pneumonia     |           |
| <b>NO<sub>2</sub></b>                       | 10µg/m <sup>3</sup> change  | <b>1.07</b>  | 0.96-1.20 | <b>0.98</b>         | 0.91-1.05 | <b>0.98</b> | 0.82-1.18 | <b>1.08</b>   | 0.98-1.20 |
| <b>PM<sub>2.5</sub> Traffic Exhaust</b>     | 0.5µg/m <sup>3</sup> change | <b>1.04</b>  | 0.93-1.15 | <b>0.99</b>         | 0.92-1.06 | <b>0.99</b> | 0.84-1.18 | <b>1.04</b>   | 0.95-1.14 |
| <b>PM<sub>2.5</sub> Traffic Non-Exhaust</b> | 0.5µg/m <sup>3</sup> change | <b>1.02</b>  | 0.90-1.16 | <b>0.98</b>         | 0.90-1.06 | <b>0.96</b> | 0.79-1.16 | <b>1.05</b>   | 0.95-1.16 |

All Hazard Ratios adjusted for Age, gender, smoking, BMI & IMD.

**Table S6 – Hazard ratios for between and within practice effects for all outcomes during 2005-2011 by NO<sub>x</sub>, PM<sub>2.5</sub> (traffic sources only) and L<sub>night</sub>**

| Exposure                  | Unit                       | Within or<br>Between practice | CHD          |           | MI                  |           | Stroke      |           | Heart failure |           |
|---------------------------|----------------------------|-------------------------------|--------------|-----------|---------------------|-----------|-------------|-----------|---------------|-----------|
|                           |                            |                               | HR           | 95% CI    | HR                  | 95% CI    | HR          | 95% CI    | HR            | 95% CI    |
| NO <sub>x</sub>           | 20µg/m <sup>3</sup> change | Between                       | <b>0.97</b>  | 0.88-1.07 | <b>0.85</b>         | 0.73-0.99 | <b>1.02</b> | 0.91-1.15 | <b>1.09</b>   | 0.93-1.28 |
|                           |                            | Within                        | <b>1.00</b>  | 0.92-1.09 | <b>1.03</b>         | 0.91-1.18 | <b>0.89</b> | 0.79-1.00 | <b>1.03</b>   | 0.90-1.18 |
| PM <sub>2.5</sub> Traffic | 1µg/m <sup>3</sup> change  | Between                       | <b>0.95</b>  | 0.84-1.07 | <b>0.79</b>         | 0.66-0.95 | <b>0.97</b> | 0.85-1.11 | <b>1.18</b>   | 0.96-1.44 |
|                           |                            | Within                        | <b>0.99</b>  | 0.91-1.09 | <b>1.02</b>         | 0.89-1.18 | <b>0.90</b> | 0.79-1.03 | <b>1.04</b>   | 0.90-1.21 |
| L <sub>night</sub>        | 5 dB change                | Between                       | <b>0.99</b>  | 0.82-1.19 | <b>0.84</b>         | 0.63-1.13 | <b>1.06</b> | 0.83-1.35 | <b>1.48</b>   | 1.07-2.05 |
|                           |                            | Within                        | <b>0.99</b>  | 0.96-1.01 | <b>1.00</b>         | 0.96-1.05 | <b>0.97</b> | 0.93-1.01 | <b>1.01</b>   | 0.96-1.06 |
|                           |                            |                               | Hypertension |           | Atrial fibrillation |           | COPD        |           | Pneumonia     |           |
| NO <sub>x</sub>           | 20µg/m <sup>3</sup> change | Between                       | <b>1.15</b>  | 1.03-1.28 | <b>1.00</b>         | 0.89-1.13 | <b>1.06</b> | 0.84-1.33 | <b>1.13</b>   | 0.99-1.29 |
|                           |                            | Within                        | <b>0.94</b>  | 0.89-0.99 | <b>0.97</b>         | 0.88-1.09 | <b>0.94</b> | 0.86-1.03 | <b>0.96</b>   | 0.88-1.06 |
| PM <sub>2.5</sub> Traffic | 1µg/m <sup>3</sup> change  | Between                       | <b>1.18</b>  | 0.99-1.41 | <b>0.99</b>         | 0.86-1.13 | <b>1.08</b> | 0.78-1.50 | <b>1.17</b>   | 0.98-1.39 |
|                           |                            | Within                        | <b>0.93</b>  | 0.87-0.98 | <b>0.99</b>         | 0.88-1.11 | <b>0.93</b> | 0.84-1.02 | <b>0.95</b>   | 0.85-1.05 |
| L <sub>night</sub>        | 5 dB change                | Between                       | <b>1.20</b>  | 0.83-1.74 | <b>1.13</b>         | 0.92-1.39 | <b>1.15</b> | 0.71-1.87 | <b>1.22</b>   | 0.92-1.62 |
|                           |                            | Within                        | <b>0.99</b>  | 0.97-1.00 | <b>0.98</b>         | 0.96-1.01 | <b>0.98</b> | 0.95-1.01 | <b>0.98</b>   | 0.94-1.01 |

All Hazard Ratios adjusted for Age, gender, smoking, BMI & IMD.
